# Supplementary material for: Ruthenium-catalyzed estragole isomerization: high trans-selective formation of anethole
Source: Royal Society of Chemistry journal article supplement (doi:10.1039/c003901b), 2010-01-01
Supplement: c003901b.pdf [file c003901b.pdf]

## Supporting Information

### Ruthenium-catalyzed estragole isomerization: high *trans*-selective formation of anethole.

Beatriz Lastra-Barreira, Pascale Crochet\*

*Departamento de Química Orgánica e Inorgánica, Instituto Universitario de Química  
Organometálica “Enrique Moles” (Unidad Asociada al CSIC), Facultad de Química,  
Universidad de Oviedo, E-33071 Oviedo, Spain. Fax: (+34)-985 10 34 46, e-mail:  
crochetpascale@uniovi.es.*

**Spectroscopic data of *trans*-anethole.**  $^1\text{H}$  NMR,  $\text{CDCl}_3$ ,  $\delta$ : 7.32 and 6.89 (both d, 2 H each,  $^3J_{\text{HH}} = 8.8$  Hz,  $\text{CH}_{\text{aromatics}}$ ), 6.41 (broad d, 1 H,  $^3J_{\text{HH}} = 15.7$  Hz,  $\text{CH}=\text{}$ ), 6.15 (dq, 1 H,  $^3J_{\text{HH}} = 15.7$  Hz,  $^3J_{\text{HH}} = 6.6$  Hz,  $=\text{CHMe}$ ), 3.84 (s, 3 H, OMe), 1.92 (dd, 3 H,  $^3J_{\text{HH}} = 6.6$  Hz,  $^4J_{\text{HH}} = 1.4$  Hz,  $=\text{CHMe}$ ).  $^{13}\text{C}\{^1\text{H}\}$  NMR,  $\text{CDCl}_3$ ,  $\delta$ : 159.1 and 131.8 ( $\text{C}_{\text{aromatics}}$ ), 131.0 and 123.8 ( $\text{CH}=\text{}$ ), 127.4 and 114.4 ( $\text{C}_{\text{aromatics}}$ ), 55.6 (OMe), 18.9 (Me).

**Spectroscopic data of *cis*-anethole:**  $^1\text{H}$  NMR,  $\text{CDCl}_3$ ,  $\delta$ : 5.77 (dq, 1 H,  $^3J_{\text{HH}} = 11.5$  Hz,  $^3J_{\text{HH}} = 7.1$  Hz,  $=\text{CHMe}$ ), 3.85 (s, 3 H, OMe), 1.96 (dd, 3 H,  $^3J_{\text{HH}} = 7.1$  Hz,  $^4J_{\text{HH}} = 1.8$  Hz,  $=\text{CHMe}$ ). The other signals are partially overlapped by those of *trans*-anethole, always presents as the major product.

**Chromatographic analyses:** GC analyses have been performed on an Hewlett-Packard HP6890 apparatus equipped with a flame ionization detector (FID) and a capillary Supelco Beta-Dex<sup>TM</sup> 120 column (30 m length, 250  $\mu\text{m}$  diameter), using a 4 mL/min flow of helium. *Temperature program used:* initial temperature, 160°C; heating, 10°C/min; final temperature, 210°C. *Retention times:*  $t_{\text{R}}(\text{estragole}) = 1.76$  min;  $t_{\text{R}}(\text{trans-anethole}) = 2.01$  min;  $t_{\text{R}}(\text{cis-anethole}) = 2.19$  min.

<sup>1</sup>H NMR spectrum of isolated *trans*-anethole (in CDCl<sub>3</sub>)

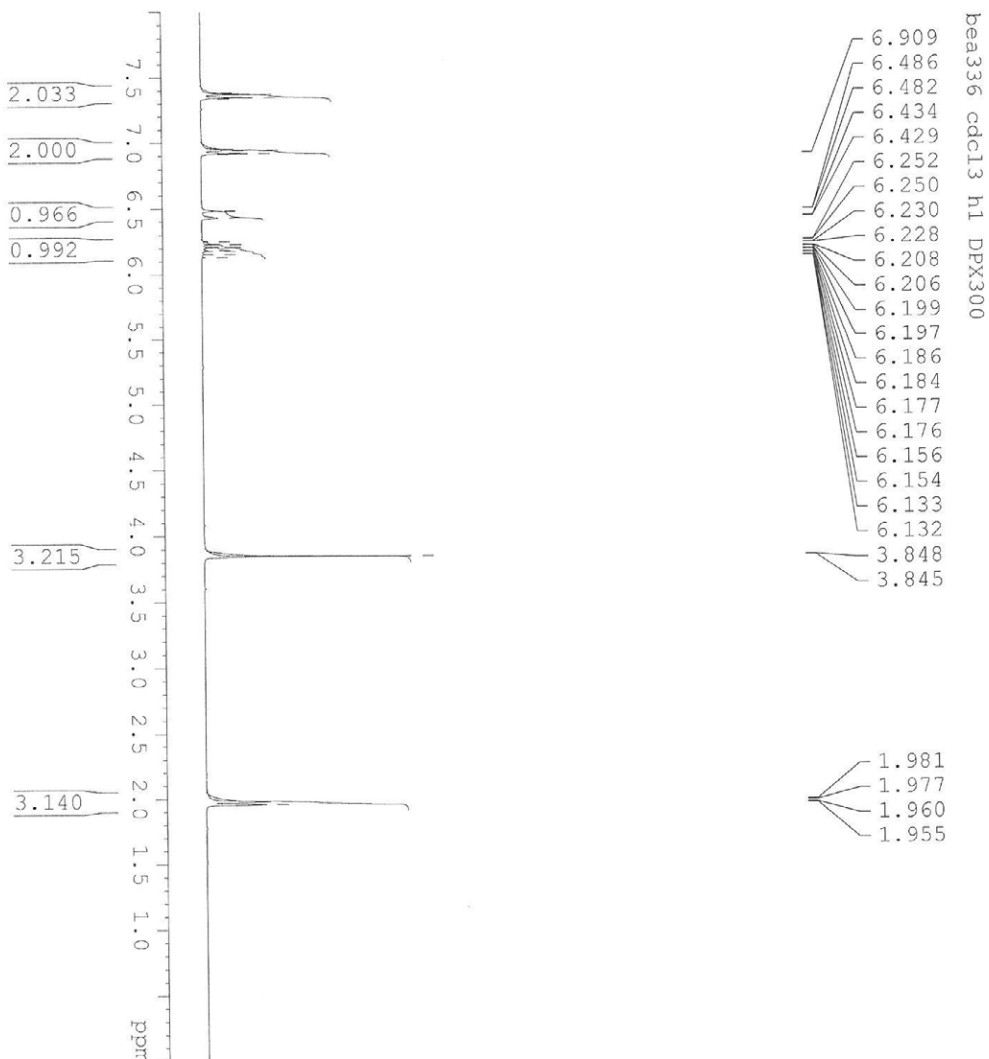

Current Data Parameters  
 NAME g1jn2450  
 EXPNO 3  
 PROCNO 1

F2 - Acquisition Parameters

Date\_ 20090624  
 Time 14.12  
 INSTRUM spect  
 PROBHD 5 mm QNP 1H/13  
 PULPROG zg30  
 TD 16384  
 SOLVENT CDCl3  
 NS 8  
 DS 2  
 SWH 4664.179 Hz  
 FIDRES 0.284679 Hz  
 AQ 1.7564148 sec  
 RG 22.6  
 DW 107.200 usec  
 DE 6.50 usec  
 TE 295.2 K  
 D1 0.50000000 sec  
 TD0 1

==== CHANNEL F1 =====

NUC1 1H  
 P1 6.30 usec  
 PL1 -6.00 dB  
 SFO1 300.1321819 MHz

F2 - Processing parameters

SI 16384  
 SF 300.1300060 MHz  
 WDW no  
 SSB 0  
 LB 0.00 Hz  
 GB 0  
 PC 1.00

<sup>13</sup>C{<sup>1</sup>H} NMR spectrum of isolated *trans*-anethole (in CDCl<sub>3</sub>)

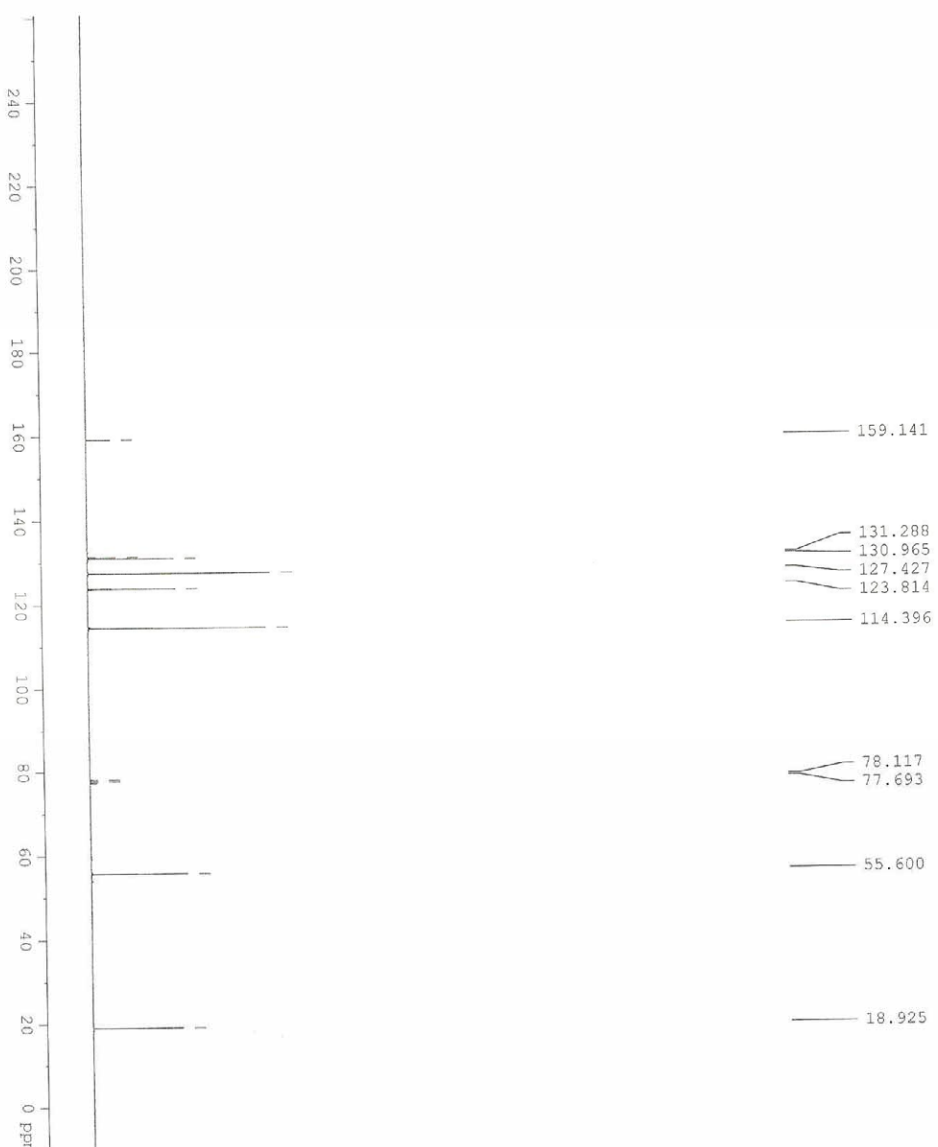

bea336 cdcl3 C13 CPD DPX300

Current Data Parameters  
 NAME g1jn2450  
 EXPNO 2  
 PROCNO 1

F2 - Acquisition Parameters  
 Date\_ 20090824  
 Time 14.07  
 INSTRUM spect  
 PROBHD 5 mm QNP 1H/13  
 PULPROG zgpg30  
 TD 32768  
 SOLVENT CDCl3  
 NS 153  
 DS 4  
 SWH 20491.803 Hz  
 FIDRES 0.625360 Hz  
 AQ 0.7995892 sec  
 RG 11585.2  
 DW 24.400 usec  
 DE 20.00 usec  
 TE 295.2 K  
 D1 1.00000000 sec  
 d11 0.03000000 sec  
 DELTA 0.89999998 sec  
 TDO 1

==== CHANNEL F1 =====  
 NUQ1 13C  
 P1 7.00 usec  
 PL1 -4.00 dB  
 SFO1 75.4771525 MHz

==== CHANNEL E2 =====  
 CPDPRG2 waltz16  
 NUQ2 1H  
 PCPD2 80.00 usec  
 PL2 -6.00 dB  
 PL12 21.00 dB  
 PL13 120.00 dB  
 SFO2 300.1312005 MHz

F2 - Processing parameters  
 SI 32768  
 SF 75.4677190 MHz  
 WDW EM  
 SSB 0  
 LB 1.00 Hz  
 GB 0  
 PC 1.40
